# Supplementary material
Source: PubMed Central journal article supplement (PMC7357191)
Supplement: bloodBLD2019003480-suppl1.pdf [file bloodBLD2019003480-suppl1.pdf]

## **Supplemental Methods and Data**

### **Stress erythropoiesis Cultures**

Isolated murine bone marrow cells were cultured in stress erythropoiesis expansion media (SEEM) for 5 days and switched to stress erythropoiesis differentiation media (SEDM) for 3 days. SEEM contains Gibco IMDM (Invitrogen) supplemented with 10% fetal bovine serum (Gemini Bio-Products), 1% penicillin-streptomycin, 10 µg/ml insulin, 200 µg/ml transferrin, 2mM L-glutamine, 0.01g/ml bovine serum albumin, 7 µl/L 2-mercaptoethanol, 30 ng/ml GDF15 (Novoprotein), 15 ng/ml BMP4 (R&D systems), 50 ng/ml SCF (Goldbio) and 25 ng/ml SHH (GoldBio). SEDM contains Gibco IMDM, all supplements in SEEM and 3U/ml Epo. Cells were incubated at 2% O<sub>2</sub>, 5% CO<sub>2</sub> when cultured in SEDM. Sorted murine spleen cells were cultured in SEEM and SEDM for indicated period of time.

### **Murine BMDM cultures**

L929 cell line was cultured in DMEM supplemented with 10% fetal bovine serum and 1% penicillin-streptomycin. L929 supernatants were filtered and collected after 7 days. Isolated murine bone marrow cells were cultured in DMEM with 10% fetal bovine serum, 1% penicillin-streptomycin and 10% L929 supernatants for 5 days to generate BMDMs. Media were changed every 2 to 3 days.

### **Human BMDM culture**

Human bone marrow mononuclear cells (MNCs) (ReachBio) were thawed at 37°C water according to the ReachBio instructions. MNCs were enumerated and cell concentrations were adjusted to  $5 \times 10^5$  cells/mL. MNCs were cultured in Gibco RPMI-1640 (Invitrogen) supplemented with 10% fetal bovine serum (Gemini Bio-Products), 1% penicillin-streptomycin, 2 mM L-glutamine and recombinant human macrophage colony-stimulating factor (M-CSF) (GoldBio). 10 ng/mL M-CSF were supplemented for the first 24 hours and 25 ng/mL M-CSF were supplemented for the following culture period. Media were changed every 2 to 3 days. Human BMDMs were enriched after 10 to 15 days.

## **Tamoxifen dependent deletion of floxed mouse alleles.**

Homozygous floxed mice were crossed with Rosa26-CreERT mice to generate floxed;Rosa26-CreERT mutants. To delete Stat5 in vivo, Tamoxifen was injected into mice every day for 5 days (75 mg/kg). Isolated bone marrow cells were treated with 1 $\mu$ M 4-hydroxytamoxifen (Sigma Aldrich) for 24 hours to induce deletion of Stat5 and  $\beta$ -catenin in vitro.

## **BMT and complete blood count assay**

For BMT, Stat5<sup>fx/fx</sup>;Rosa26-CreERT and  $\beta$ -catenin<sup>fx/fx</sup>;Rosa26-CreERT bone marrow cells were isolated and cultured in SEEM with 4-OHT for 24 hours to generate Stat5 <sup>$\Delta/\Delta$</sup>  cells and  $\beta$ -catenin <sup>$\Delta/\Delta$</sup>  cells. Stat5<sup>fx/fx</sup> or  $\beta$ -catenin<sup>fx/fx</sup> cells were also treated with 4-OHT as control. For experiments using purified SEPs as donor cells,  $\beta$ -catenin<sup>fx/fx</sup>;Rosa26-CreERT,  $\beta$ -catenin<sup>fx/fx</sup> or C57BL/6-GFP bone marrow cells were expanded in SEEM for 5 days.  $\beta$ -catenin<sup>fx/fx</sup>;Rosa26-CreERT,  $\beta$ -catenin<sup>fx/fx</sup> cultures were treated with 4-OHT for 24 hours to induce deletion of  $\beta$ -catenin as described above. CD133+Kit+Sca1+ cells from each culture were isolated by Flow sorting. Recipient mice were lethally irradiated (950 cGy) and transplanted with unfractionated donor bone marrow cells (5x10<sup>5</sup>/transplant) or purified SEPs (5x10<sup>4</sup> mutant or control SEPs + 5x10<sup>4</sup> GFP+ SEPs). Peripheral blood was collected retro-orbitally on indicated days and transferred to blood collection tubes coated with EDTA (BD). Hemavet 950 was used for hematological analysis.

## **Phenylhydrazine (PHZ) treatment and monocytes transfer**

Resident splenic macrophages were depleted with clodronate liposomes (ClodronateLiposomes.org). A single dose of clodronate (100 $\mu$ l/10g body weight) is injected retro-orbitally. Donor monocytes were purified by using EasySep Monocyte Enrichment Kit (Stem Cell Technologies). 24 hours after clodronate administration, 1x10<sup>6</sup> monocytes were transferred into recipient mice by retro-orbital injection. Recipient mice were injected with a single dose of PHZ (100mg/kg body weight) intraperitoneally 24 hours after monocytes transfer.

## **Splenic EBI isolation**

The isolation of splenic EBIs was done as previously described<sup>2-4</sup>. In brief, spleens were minced and digested in 0.075% (*m/v*) Collagenase IV (Gibco 17104019) and 0.004% (*m/v*) DNase I (Invitrogen DN25) in RPMI1640 for 30min at 37°C. The suspension was gently passed through an 18-gauge needle several times and cells were washed by centrifugation. Cell pellets were resuspended with 1mL RPMI1640 containing 0.004% DNase I and layered on top of 30% (*v/v*) FBS in Iscove's Modified Dulbecco's Medium (IMDM) followed by gravity sedimentation for 45 minutes at room temperature. The supernatant was carefully removed and the pellet was processed with Percoll (Sigma) gradient centrifugation (50%(*v/v*)/100%(*v/v*)) at 400g for 20min. The interface between the 50% and 100% Percoll was collected, washed with PBS, and processed for flow cytometry and imaging flow cytometry.

### **Immunocytochemistry**

Spleen macrophages and BMDMs were fixed with 4% formaldehyde (Sigma-Aldrich) for 20 min at room temperature (RT). Cells were washed with PBST (PBS containing 0.1% Tween20) and permeabilized by 0.3% Triton X-100. Samples were blocked with 1% BSA in PBST for 30 min at RT and incubated with primary antibodies (F4/80, 123102, Biolegend and Phospho-Stat5a/b, ab32364, Abcam) at 4 °C overnight. Secondary antibodies (FITC-conjugated goat anti-rabbit IgG, sc-2012, Santa Cruz Biotechnology and Alexa 647-conjugated goat anti-rabbit IgG, A21244, Life Technologies) were applied for 1h in dark. After washing with PBST for 3 times, samples were mounted in Prolong Gold Antifade Mountant with DAPI (P-36931, Life Technologies). FV1000 confocal microscope (Olympus) was used for imaging.

### **Lipid extraction and liquid chromatography–tandem mass spectrometry (LC-MS/MS) analysis**

Prostaglandins (PGs) were extracted from BMDMs and BMDM cell culture supernatants by using C18 Sep-pak cartridges (Waters). Briefly, culture supernatants were acidified with 1N HCl and loaded on to the Sep-Pak cartridge, bound PGs were eluted with methanol, evaporated under the stream of nitrogen gas and stored in ethyl acetate at –80° C until further analysis. For intracellular PGs, cell pellets were washed twice with DPBS, suspended in 1 mL of 80% methanol and homogenized with 0.1 mm zirconium beads using a bead beater homogenizer under standard cycle conditions.

Homogenates were centrifuged at 20000 x g for 10 mins at 4° C. Supernatants were transferred to a clean brown glass vial, evaporated under nitrogen, dissolved in ultrapure water, acidified and extracted as described above. After extraction, PGs were suspended in 70% methanol and analyzed by LC-MS/MS. Quantitative analysis of  $\Delta^{12}$ -PGJ<sub>2</sub> and PGE<sub>2</sub> was performed using a calibration curve generated by respective standards in multiple reaction monitoring (MRM) mode. Following mass transitions were used to detect each PG:  $\Delta^{12}$ -PGJ<sub>2</sub> (332.8/188.9; 332.8/314.9; 332.8/271.3 m/z) and PGE<sub>2</sub> (351/315; 351/271; 351/189). Data acquisition and analysis were performed using Analyst software (version 1.5; AB Sciex). PGs were normalized to cell number.

### **PKH26 cell membrane labeling**

Bone marrow cells were isolated and immediately labeled with PKH26 by following the manufacture instructions (PKH26 Red Fluorescent Cell Linker Kits, Sigma-Aldrich). Cells were collected and stained with other cell surface markers before flow cytometry analysis. PKH26 were detect by using LSR-II Fortessa Flow cytometer (BD Biosciences) with 561nm laser and 575/26 filter.

### **Flow cytometry and cell sorting**

Cells were collected and labeled with indicated antibodies. A list of antibodies was provided in supplemental table S1. Dead cells were determined by zombie yellow fixable viability dye (BioLegend) staining. LSR-II Fortessa Flow cytometer (BD Biosciences) was used for flow cytometry analysis. All flow cytometry data were analyzed with FlowJo software. Astrios (Becton Dickinson) cell sorter was used for cell sorting.

### **Epo and PGE<sub>2</sub> ELISA assay**

Peripheral blood was collected by cardiac puncture and transferred to serum separator tubes (BD). Serum samples were separated by centrifuge, collected and stored at -80 °C before use. Serum Epo concentrations were measured by Mouse Erythropoietin Quantikine ELISA Kit (R&D systems). Spleens were collected and weighed on indicated days after BMT. Cells were homogenized in PBS and PGE<sub>2</sub> levels were measured by

ELISA immediately. Splenic and serum PGE<sub>2</sub> concentrations were measured by Prostaglandin E<sub>2</sub> Express EIA Kit (Cayman Chemical Company) and Prostaglandin E<sub>2</sub> Metabolite EIA Kit (Cayman Chemical Company), respectively.

### **Quantitative reverse transcription PCR (RT-qPCR)**

Total RNA was isolated by using TriZol reagent (Invitrogen). Complementary DNA (cDNA) was generated by using the qScript cDNA SuperMix (Quanta Biosciences). qPCR was done by using StepOnePlus Real-Time PCR System (Applied Biosystems). A list of TaqMan probes is provided in supplemental table S2.

### **Gene Set Enrichment Analysis (GSEA)**

Microarray data transcriptomics analysis was done previously<sup>1</sup>. The data were deposited into NCBI's Gene Expression Omnibus (GEO) for public access via GEO accession number, GSE122390. Gene expression profile was visualized by Transcriptome Analysis Console (TAC) software (Affymetrix). Normalized dataset was also processed with Gene Set Enrichment Analysis (GSEA) in order to determine statistically differentially expressed gene sets in the two groups of SEPs. Hallmark gene sets were accessed from Molecular Signatures Database (MSigDB).

### **Supplemental References**

1. Hao, S., Xiang, J., Wu, D-C., Fraser, J., Ruan, B., Cai, J., Patterson, A., Lai, Z-C., and Paulson, R.F. (2019) Gdf15 regulates murine stress erythroid progenitor proliferation and the development of the splenic erythropoiesis niche. *Blood Advances* 3, 2205-2217.
2. Sadahira, Y., Mori, M. & Kimoto, T. Isolation and short-term culture of mouse splenic erythroblastic islands. *Cell Struct Funct* 15, 59-65 (1990).
3. Liao, C. *et al.* Selenoproteins regulate stress erythroid progenitors and spleen microenvironment during stress erythropoiesis. *Blood*, doi:10.1182/blood-2017-08-800607 (2018).

4. Liao C, Prabhu KS and Paulson RF. Monocyte-derived macrophages expand the murine stress erythropoietic niche during the recovery from anemia. *Blood*. 2018;132(24):2580-2593.

## Supplemental Tables

**Table S1. Flow cytometry antibody list.**

| <b>Antibodies</b> | <b>Fluorochrome</b>  | <b>Source</b> | <b>Catalog No.</b> |
|-------------------|----------------------|---------------|--------------------|
| CD34              | Alexa Fluor 647      | BD            | 560230             |
| CD133             | PE                   | eBiosciences  | 12133182           |
| CD133             | PE-Cy7               | BioLegend     | 141210             |
| Kit (c-kit)       | Brilliant Violet 421 | BioLegend     | 1058282            |
| Sca1 (Ly-6A/E)    | APC-Cy7              | BioLegend     | 108126             |
| Sca1 (Ly-6A/E)    | FITC                 | Biolegend     | 108106             |
| Phospho-Stat5     | Alexa Fluor 647      | BD            | 562074             |
| F4/80             | PE-Cy7               | Biolegend     | 123114             |
| F4/80             | APC                  | Biolegend     | 123116             |
| Ter119            | FITC                 | Biolegend     | 116206             |
| CD45.2            | PE                   | Biolegend     | 109808             |
| CD16/32           | N/A                  | Biolegend     | 101302             |

**Table S2. TaqMan probe list**

| <b>Gene</b>  | <b>Catalog No.</b> |
|--------------|--------------------|
| 18s          | Hs99999901_s1      |
| EpoR         | Mm00833882_m1      |
| Wnt1         | Mm01300555_g1      |
| Wnt2         | Mm00470018_m1      |
| Wnt2b        | Mm00437330_m1      |
| Wnt3         | Mm03053665_s1      |
| Wnt3a        | Mm00437337_m1      |
| Wnt4         | Mm01194003_m1      |
| Wnt5a        | Mm00437347_m1      |
| Wnt5b        | Mm01183986_m1      |
| Wnt6         | Mm00437353_m1      |
| Wnt7a        | Mm00437354_m1      |
| Wnt7b        | Mm01301717_m1      |
| Wnt8a        | Mm01157914_g1      |
| Wnt8b        | Mm00442107_m1      |
| Wnt9a        | Mm00460518_m1      |
| Wnt9b        | Mm00457102_m1      |
| Wnt10a       | Mm00437325_m1      |
| Wnt10b       | Mm00442104_m1      |
| Wnt11        | Mm00437328_m1      |
| Wnt16        | Mm00446420_m1      |
| Wnt2b(human) | Hs00921614_m1      |

|               |               |
|---------------|---------------|
| Wnt8a(human)  | Hs00230534_m1 |
| HPGDS         | Mm00479846_m1 |
| PPAR $\gamma$ | Mm00440940_m1 |
| PTGES         | Mm00452105_m1 |



## Supplemental Data

**A**

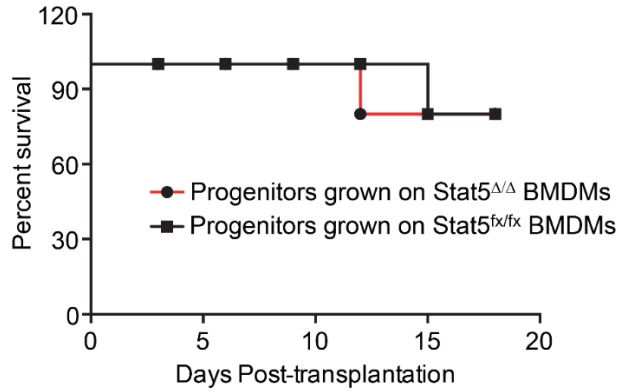

**B**

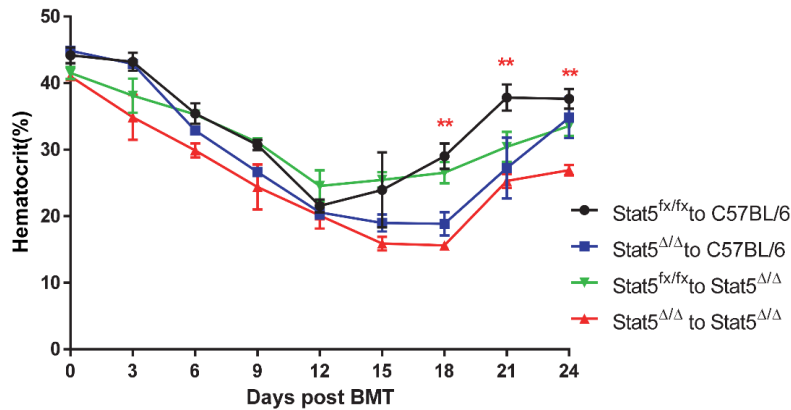

**Figure S1. (A) Survival of mice transplanted with SEPs generated on Stat5 $^{fx/fx}$  or Stat5 $\Delta\Delta$  BMDMs.** Sorted CD34+CD133+KS donor bone marrow cells were cultured on Stat5 $^{fx/fx}$  or Stat5 $\Delta\Delta$  BMDMs in SEEM media. Lethally irradiated C57BL/6 recipient mice were transplanted with 5,000 cultured CD34+CD133+KS donor cells. n=5 mice per group. (B). Analysis of hematocrit on indicated days after BMT. 100,000 unfractionated bone marrow cells from indicated donor mice were transplanted to the indicated recipient mice. Two-way ANOVA followed by Bonferroni's multiple comparisons. Data represent means  $\pm$  SEM. \*\* p < 0.01. \* represent p values of comparisons between Stat5 $\Delta\Delta$  to C57BL/6 group and Stat5 $\Delta\Delta$  to Stat5 $\Delta\Delta$  group. n=5 mice per group.

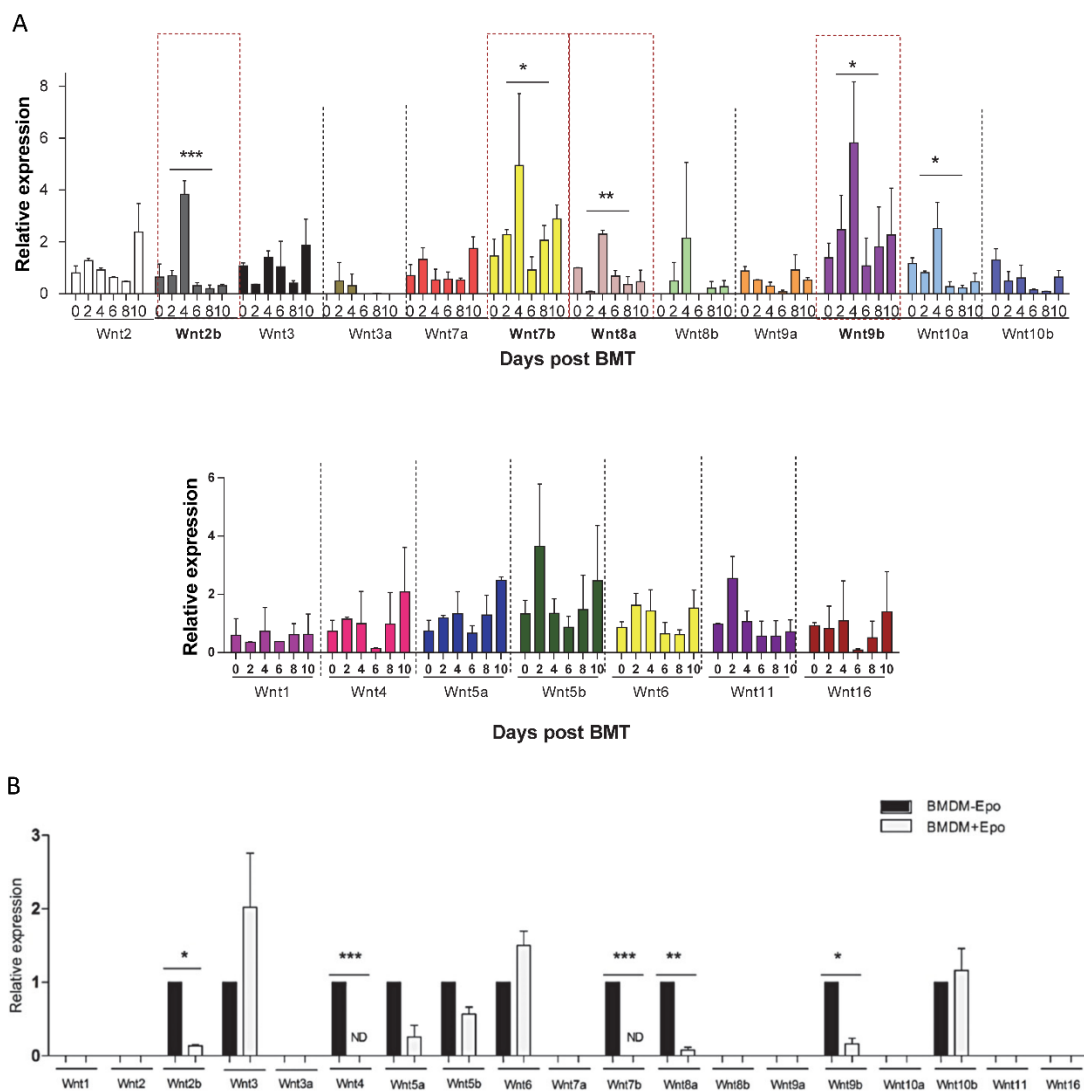

**Figure S2. Analysis of the mRNA expression of Wnt family members during stress erythropoiesis.** (A). mRNA expression of canonical Wnt ligands (top) and non-canonical Wnt ligands (bottom) in spleen cells from day 0 to day10 after BMT. 500,000 isolated C57/BL6 bone marrow cells were transplanted into lethally irradiated C57/BL6 recipient. Samples were collected every 2 days for analysis. n=2 mice per time point. One-way ANOVA. Data represent means  $\pm$  SEM. \* p < 0.05, \*\* p < 0.01, \*\*\* p < 0.001 (B). mRNA expression of canonical and non-canonical Wnt ligands in BMDMs treated  $\pm$  Epo for 24 hours. n=3 per group. ND, not detected. Two-way ANOVA followed by Bonferroni's multiple comparisons. Data represent means  $\pm$  SEM. \* p < 0.05, \*\* p < 0.01, \*\*\* p < 0.001.

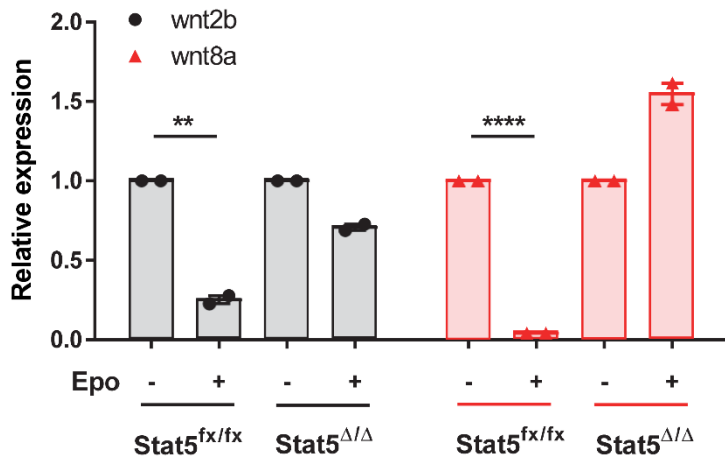

**Figure S3. Epo dependent repression of Wnt2b and Wnt8a requires Stat5.** mRNA expression of Wnt2b (left) and Wnt8a (right) in ex vivo cultured spleen macrophages from Stat5<sup>fx/fx</sup> and Stat5<sup>Δ/Δ</sup> mice treated as indicated ± Epo for 24 hours. Student t-test (2-tailed). Data represent means ± SEM. \*\* p < 0.01, \*\*\*\* p < 0.0001.

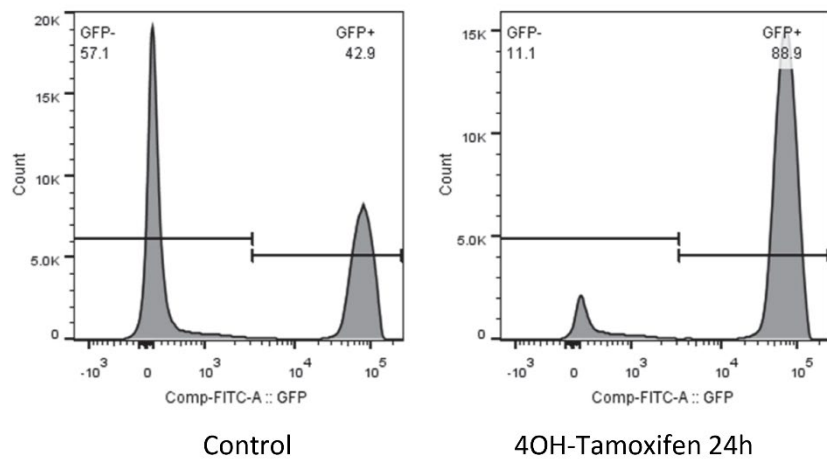

**Figure S4. Mutation of β-catenin inhibits SEP expansion.** Representative flow cytometry diagrams of GFP+ population (control cells) versus GFP- population (β-catenin<sup>Δ/Δ</sup> cells) isolated from co-cultures as described in Figure 3.

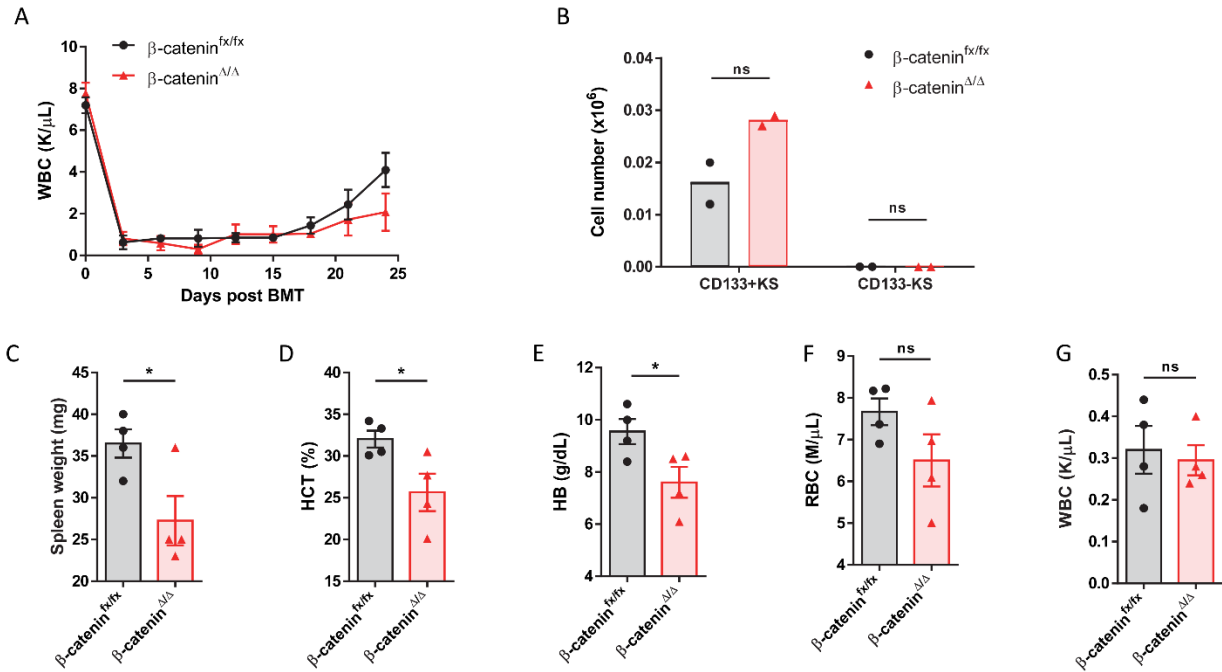

**Figure S5.  $\beta$ -catenin <sup>$\Delta/\Delta$</sup>  is required for SEP proliferation.** (A). 500,000 unfractionated bone marrow cells isolated from  $\beta$ -catenin<sup>fx/fx</sup> or  $\beta$ -catenin <sup>$\Delta/\Delta$</sup>  mice were transplanted to lethally irradiated CD45.1 C57BL/6 recipients. Analysis of WBC count after BMT. n=3 mice per group. (B-G). 50,000 GFP and 50,000 sorted CD133+KS cells isolated from  $\beta$ -catenin<sup>fx/fx</sup> or  $\beta$ -catenin <sup>$\Delta/\Delta$</sup>  mice were transplanted to lethally irradiated CD45.1 C57BL/6 recipients. Student t-test (2-tailed). Data represent means  $\pm$  SEM. \* p < 0.05, ns, not significant. (B). Flow cytometry analysis of donor SEP homing on day 1 after BMT. CD133, Kit and Sca1 expressions are shown on cells gated on GFP-CD45.2+. (C). Analysis of spleen weight on day 8. (D). Analysis of hematocrit on day 8. (E). Analysis of hemoglobin level on day 8. (F) Analysis of RBC count on day 8. (G) Analysis of WBC count on day 8.

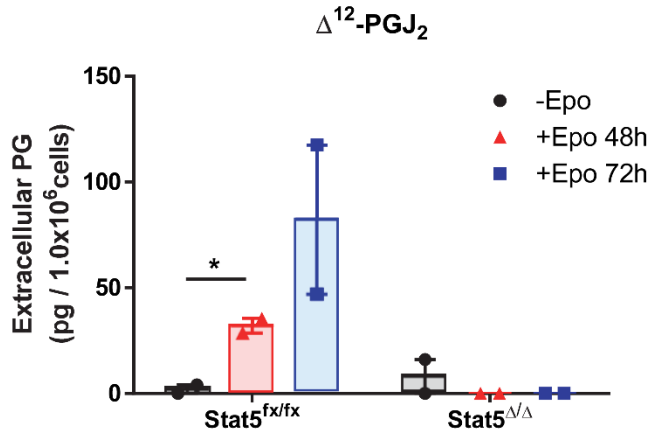

**Figure S6. Production of  $\Delta^{12}\text{-PGJ}_2$  requires Epo dependent Stat5 activation.** LC-MS/MS analysis of extracellular  $\Delta^{12}\text{-PGJ}_2$  in  $\text{Stat5}^{\text{fX/fX}}$  and  $\text{Stat5}^{\Delta/\Delta}$  BMDMs at the indicated times after Epo treatment. Two-way ANOVA followed by Bonferroni's multiple comparisons. Data represent means  $\pm$  SEM. \*  $p < 0.05$ .

A.

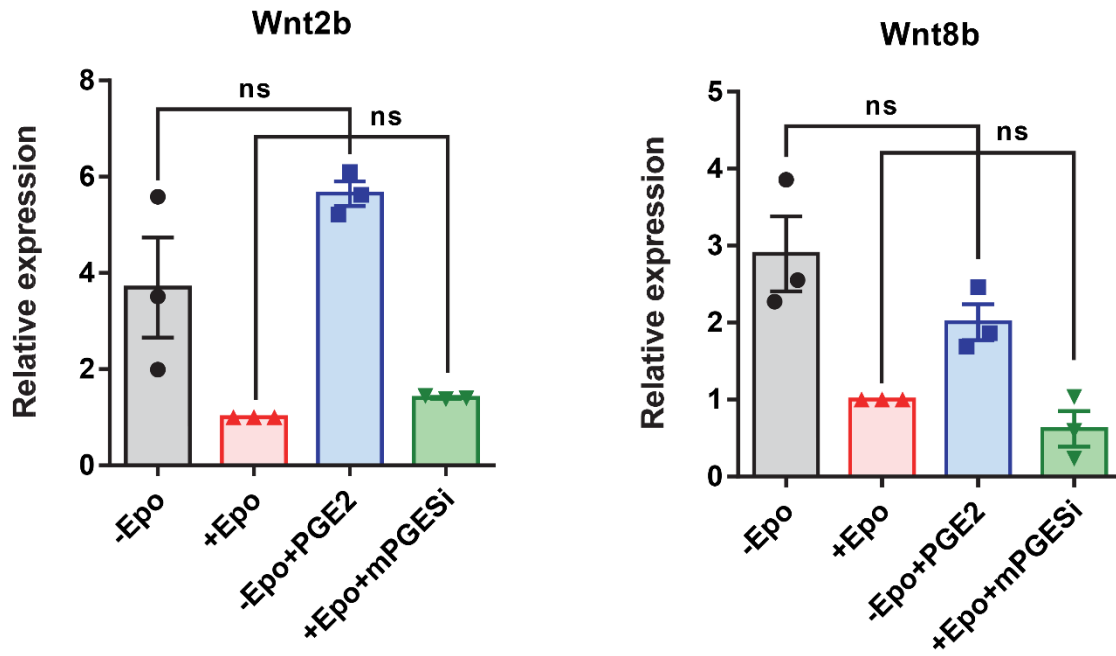

B.

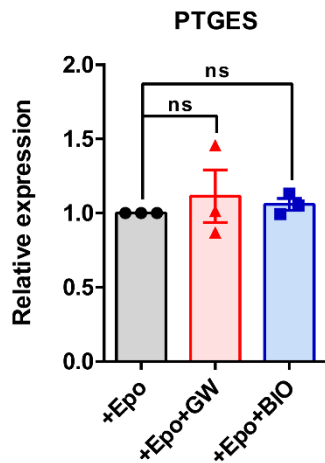

**Figure S7. PGE<sub>2</sub> does not promote repression of Wnt2b and Wnt8a expression.**

(A) mRNA expression of Wnt2b (left) and Wnt8a (right) in BMDMs treated with Epo, PGE<sub>2</sub> or mPGESi as indicated for 24 hours. Student t-test (2-tailed). Data represent means  $\pm$  SEM. ns, not significant. (B) mRNA expression of PTGES in BMDMs treated with

Epo, GW or BIO as indicated. Student t-test (2-tailed). Data represent means  $\pm$  SEM. ns, not significant.
